# Supplementary material for: Origin of multiple voltage plateaus in P2-type sodium layered oxides
Source: Royal Society of Chemistry journal article supplement (doi:10.1039/d1mh01991k), 2022-01-01
Supplement: d1mh01991k1.pdf [file d1mh01991k1.pdf]

## Electronic Supporting Information

### **Origin of Multiple Voltage Plateaus in P2-type Sodium Layered Oxides**

Yang Gan,<sup>ab</sup> Yining Li,<sup>ab</sup> Haoxin Li,<sup>abc</sup> Wujie Qiu<sup>ab</sup> and Jianjun Liu<sup>\*abc</sup>

<sup>a</sup>State Key Laboratory of High Performance Ceramics and Superfine Microstructure, Shanghai Institute of Ceramics, Chinese Academy of Sciences, 1295 Dingxi Road, Shanghai 200050, China

<sup>b</sup>Center of Materials Science and Optoelectronics Engineering, University of Chinese Academy of Sciences, Beijing 100049, China

<sup>c</sup>School of Chemistry and Materials Science, Hangzhou Institute for Advanced Study, University of Chinese Academy of Science, 1 Sub-lane Xiangshan, Hangzhou 310024, China

#### **Corresponding Author**

\*Email: [jliu@mail.sic.ac.cn](mailto:jliu@mail.sic.ac.cn)

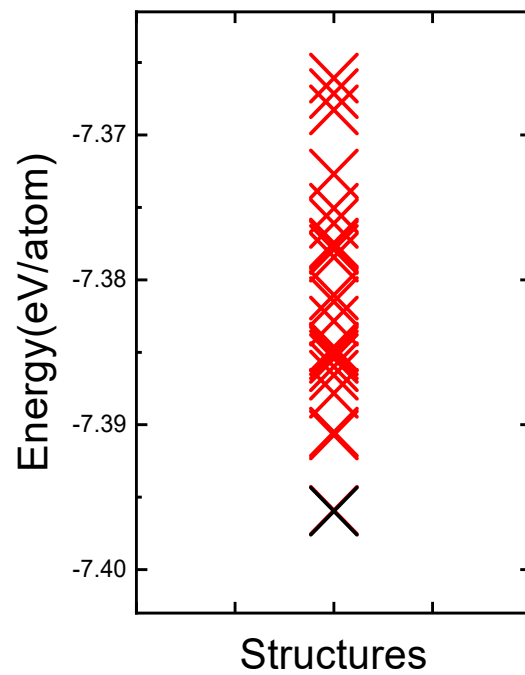

**Figure S1.** Disordered structures of P2- $\text{Na}_{0.6}[\text{Cr}_{0.6}\text{Ti}_{0.4}]\text{O}_2$ . Relative energy distribution of all SQS disordered structures of  $\text{Na}_{0.6}[\text{Cr}_{0.6}\text{Ti}_{0.4}]\text{O}_2$  after DFT relaxation. Black cross is the lowest energy structure.

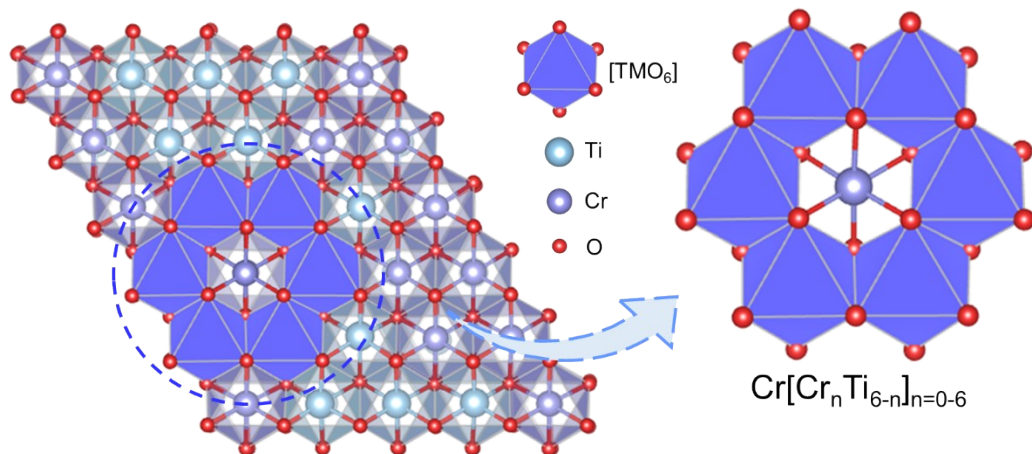

**Figure S2.** The honeycomb-like local structure  $\text{Cr}[\text{Cr}_n\text{Ti}_{6-n}]$  in the  $\text{Na}_{0.6}[\text{Cr}_{0.6}\text{Ti}_{0.4}]\text{O}_2$

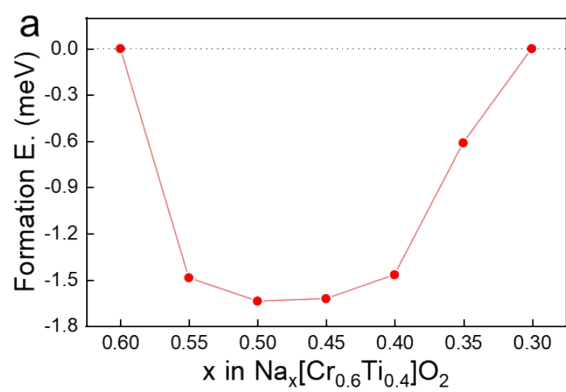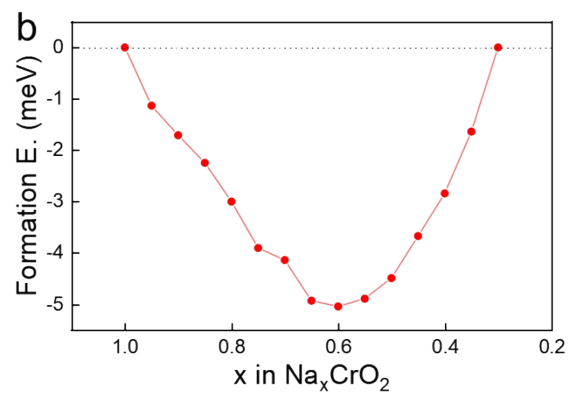

**Figure S3.** Formation energies indicate stable intermediate phases during the cycles of  $\text{Na}_x[\text{Cr}_{0.6}\text{Ti}_{0.4}]\text{O}_2$  ( $x = 0.3-0.6$ ) and  $\text{Na}_x\text{CrO}_2$  ( $x = 0.3-1.0$ ).

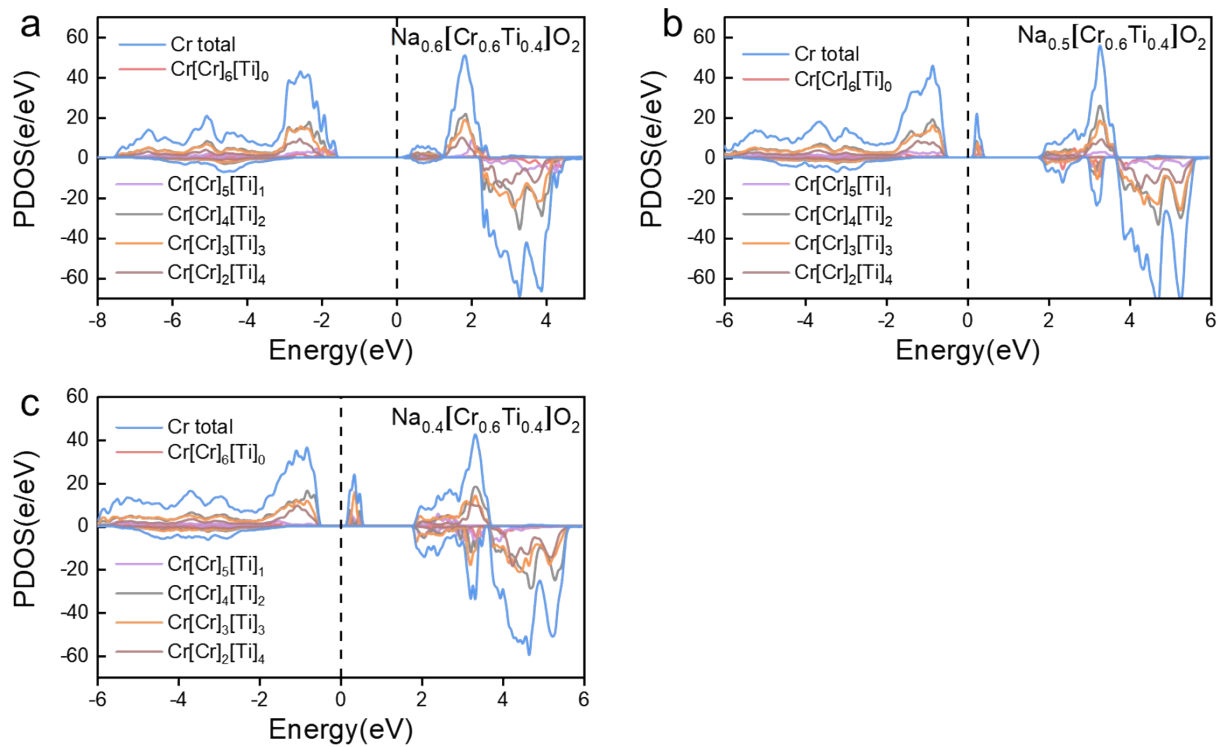

**Figure S4.** The partial density of states of different Cr in  $\text{Na}_x[\text{Cr}_{0.6}\text{Ti}_{0.4}]\text{O}_2$  ( $x=0.6, 0.5, 0.4$ ), respectively.

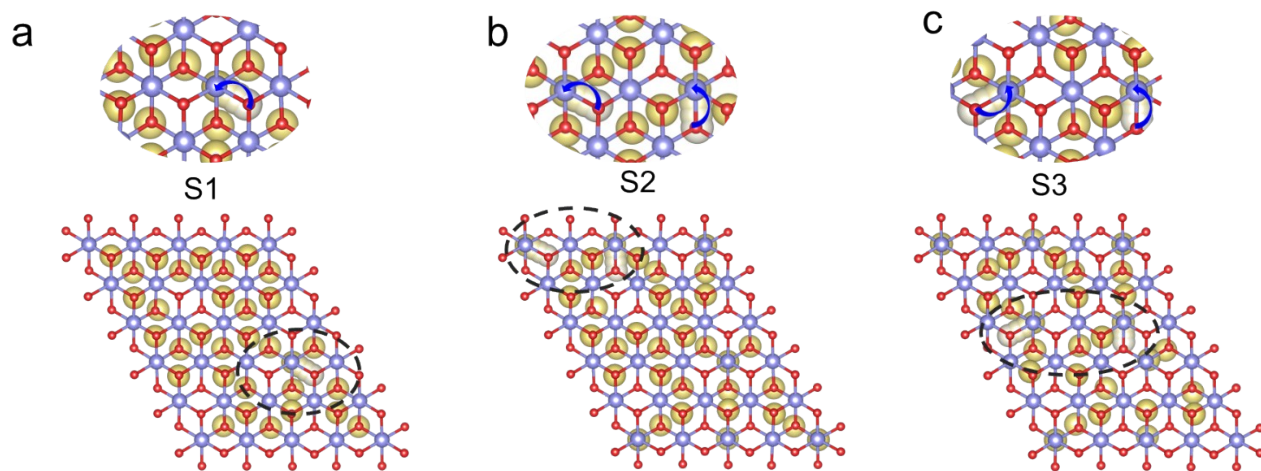

**Figure S5.** Na-ion migration from Na<sub>e</sub> sites to Na<sub>f</sub> sites at the voltage plateau S1, S2, S3, respectively. The blue arrows indicate the migration of sodium ions.

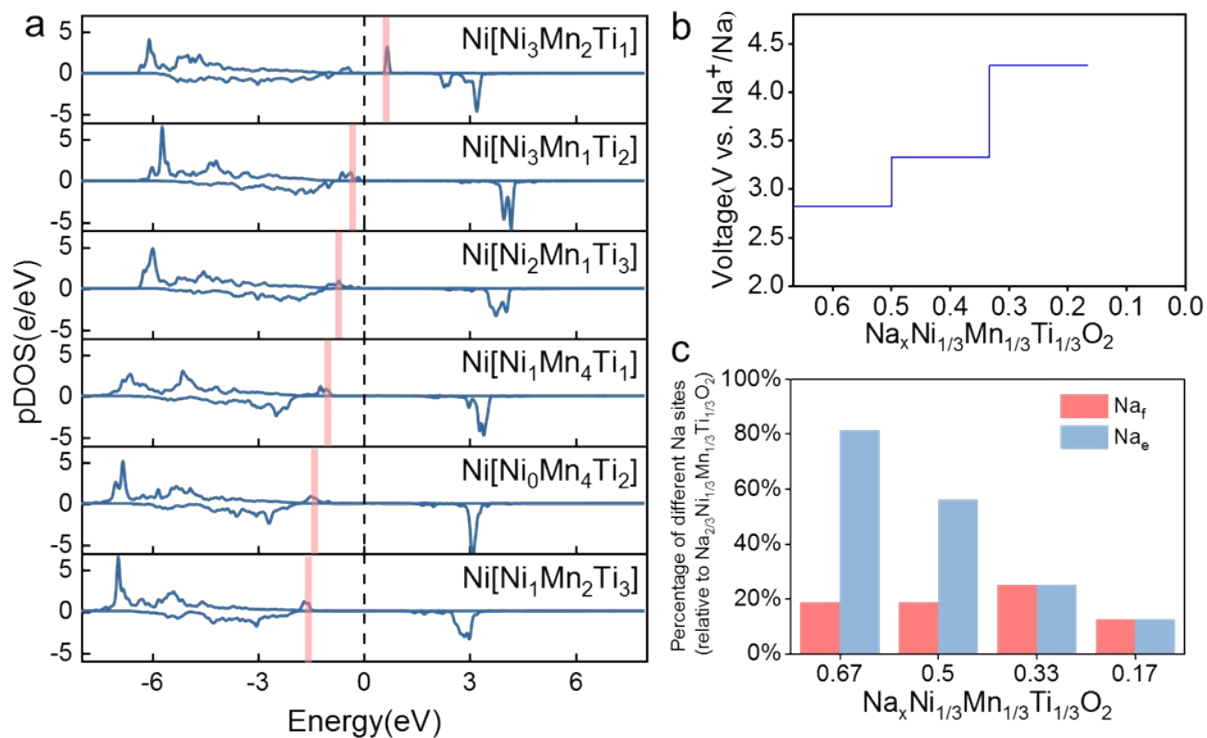

**Figure S6.** (a) Electronic structures of Ni in six typical honeycomb local structures Ni[Ni<sub>3</sub>Mn<sub>2</sub>Ti<sub>1</sub>], Ni[Ni<sub>3</sub>Mn<sub>1</sub>Ti<sub>2</sub>], Ni[Ni<sub>2</sub>Mn<sub>1</sub>Ti<sub>3</sub>], Ni[Ni<sub>1</sub>Mn<sub>4</sub>Ti<sub>1</sub>], Ni[Ni<sub>0</sub>Mn<sub>4</sub>Ti<sub>2</sub>] and Ni[Ni<sub>1</sub>Mn<sub>2</sub>Ti<sub>3</sub>] on Na<sub>2/3</sub>Ni<sub>1/3</sub>Mn<sub>1/3</sub>Ti<sub>1/3</sub>O<sub>2</sub>; (b) Calculated charging voltages of Na<sub>2/3</sub>Ni<sub>1/3</sub>Mn<sub>1/3</sub>Ti<sub>1/3</sub>O<sub>2</sub>; (c) Changes of the two Na sites within the structure of Na<sub>2/3</sub>Ni<sub>1/3</sub>Mn<sub>1/3</sub>Ti<sub>1/3</sub>O<sub>2</sub> (x=0.67, 0.5, 0.33, 0.17);

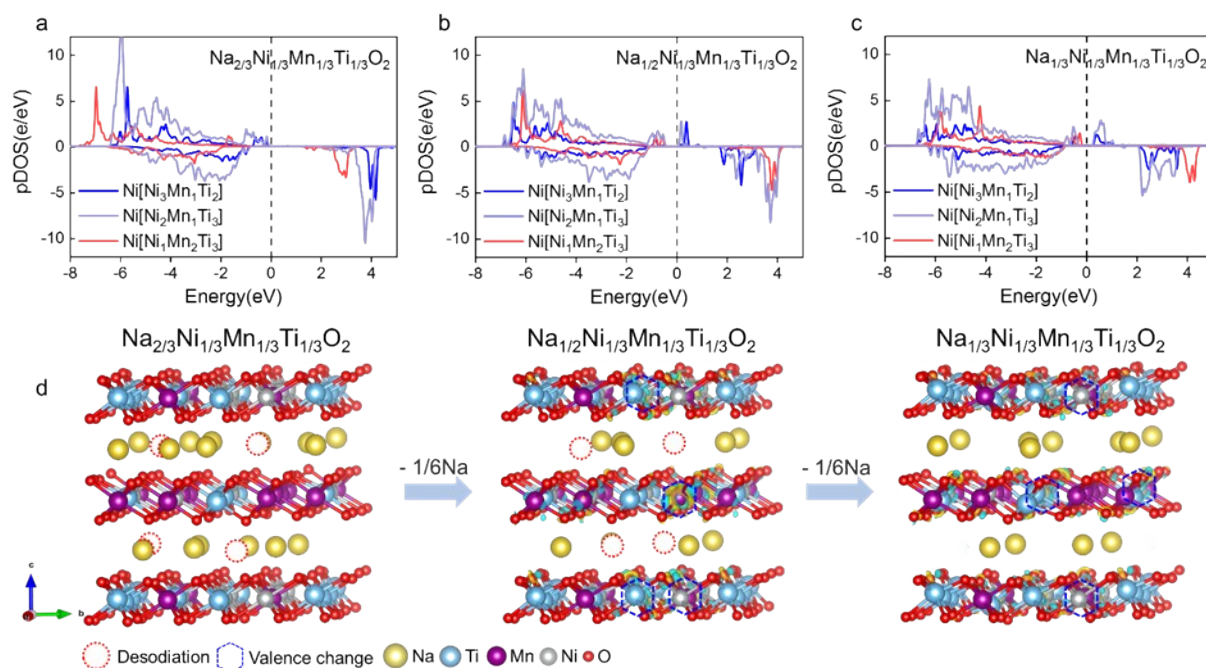

**Figure S7.** The behavior of  $\text{Na}_{2/3}\text{Ni}_{1/3}\text{Mn}_{1/3}\text{Ti}_{1/3}\text{O}_2$  in the desodiation process. (a-c) The partial density of states of  $\text{Ni}[\text{Ni}_3\text{Mn}_1\text{Ti}_2]$ ,  $\text{Ni}[\text{Ni}_2\text{Mn}_1\text{Ti}_3]$  and  $\text{Ni}[\text{Ni}_1\text{Mn}_2\text{Ti}_3]$  in  $\text{Na}_{2/3}\text{Ni}_{1/3}\text{Mn}_{1/3}\text{Ti}_{1/3}\text{O}_2$  (x=0.67, 0.5, 0.33), respectively; (d) Structure evolution and charge-density difference of  $\text{Na}_{2/3}\text{Ni}_{1/3}\text{Mn}_{1/3}\text{Ti}_{1/3}\text{O}_2$  (x=0.67, 0.5, 0.33) (yellow and blue represent positive and negative  $0.0095 \text{ e}/\text{\AA}^3$  isosurfaces, respectively) in the direction of a-axis.



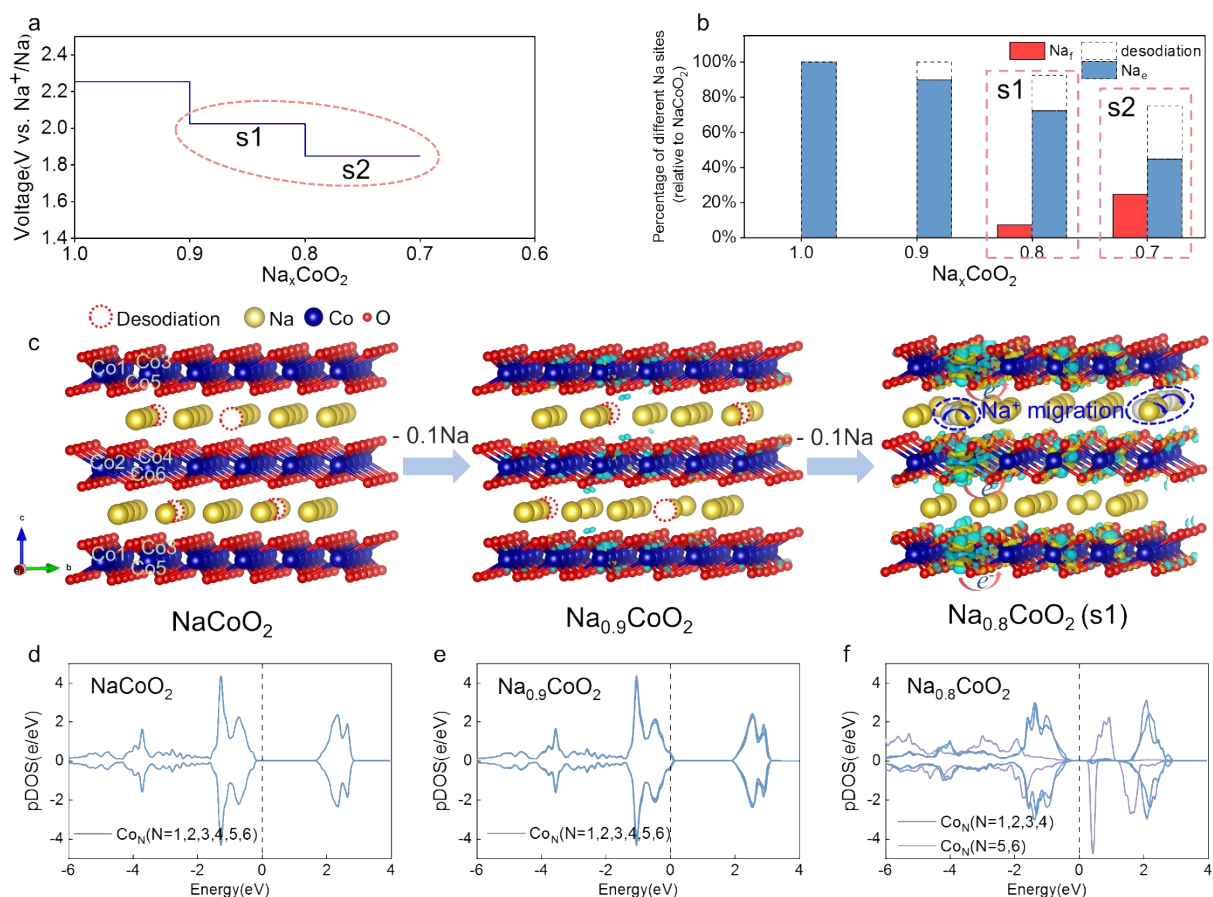

**Figure S8.** Behavior of P2-NaCoO<sub>2</sub> during the desodiation process. (a) Calculated voltage and charge transfer voltage of P2-NaCoO<sub>2</sub>; (b) Changes in the two Na sites within the structure of Na<sub>x</sub>CoO<sub>2</sub> (x = 1.0, 0.9, 0.8, 0.7) during the desodiation process. (c) Structure evolution and charge-density difference (yellow and blue represent positive and negative 0.006 e/Å<sup>3</sup> isosurfaces, respectively), typical Co1, Co2, Co3, Co4, Co5, Co6 are chosen as representatives to study the electronic structure changes. The directions of (c) are the a-axis direction. The blue arrows indicate the migration of sodium ions in (c) and the red arrows indicate the charge transfer of Co in (c); (d-f) The variation of the partial density of states of Co1, Co2, Co3, Co4, Co5, Co6 in different desodiation structures (NaCoO<sub>2</sub>, Na<sub>0.9</sub>CoO<sub>2</sub>, Na<sub>0.8</sub>CoO<sub>2</sub>).
